1 **Interdisciplinary Perspectives in Infectious Diseases**

2 **Title: COVID-19 Epidemic Dynamics and Population Projections**  
3 **from Early Days of Case Reporting in a 40 million population**  
4 **from Southern India**

5 Rashmi Pant (PhD),<sup>1</sup> Lincoln P. Choudhury (MBBS, MPH),<sup>2</sup> Jammy G. Rajesh  
6 (MBA,MD,PhD)<sup>1</sup> and Vijay V. Yeldandi (M.D, FACP, FCCP, FIDSA)<sup>1</sup>

7 <sup>1</sup> Department of Research, Society for Health, Allied Research and Education (SHARE-  
8 INDIA), Medicit Institute of Medical Sciences Campus, Ghanpur Village, Medchal Mandal  
9 & District-503401, India.

10 <sup>2</sup> Krashapana Consultancy Private limited, New Delhi-110001, India.

11

12 Correspondence should be addressed to Rashmi Pant; rashmi.pant@sharefoundations.org

## 13 **Abstract**

14 India reported its first COVID19 case on 30 January 2020. Since then the  
15 epidemic has taken different trajectories across different geographical locations  
16 in the country. This study explores the population aggregated trajectories of  
17 COVID19 susceptible, infected and recovered or dead cases in the south Indian  
18 state of Telangana with a population of approximately 40 million. Information  
19 on cases reported from March 2 to April 4 was collated from government  
20 records. The susceptible-infected-removed (SIR) model for the spread of an  
21 infectious disease was used. Transmission parameters were extracted from  
22 existing literature that has emerged over past weeks from other regions with  
23 similar population densities as Telangana. Optimisation algorithms were used to  
24 get basic reproduction rate for different phases of nonpharmaceutical  
25 interventions rolled by the government. Peak accumulation is projected towards  
26 end of July with 36% of the population being infected by August 2020 if the  
27 population lockdown or social distancing mechanism is not continued. The  
28 number of deaths assuming no intervention is projected to be 488000 (95% CI:  
29 (329400, 646600)). A draconian enforcement of population lockdown combined  
30 with hand and face hygiene adherence would reduce the transmission by at least  
31 99.7% whereas partial social distancing and hygiene would reduce it by 51.2%.  
32 Transmission parameters reported should be interpreted with caution as they are  
33 population aggregated and do not consider unique characteristics of  
34 susceptibility among micro-clusters and vulnerable individuals. More data will  
35 need to be collected to optimize transmission parameters and evaluate the full  
36 complexity, to simulate real world scenarios in the models.

37

38 **Keywords:** SARS-CoV-2, India, projections

39

40

41

42

43

44

45

46

47

48

49

## 50 **Introduction**

51 The announcement of the novel corona Virus (COVID-19 or SARS-CoV-2) as pandemic was  
52 made on January 30<sup>th</sup> 2020 [1]. The first case of COVID-19 was detected in India on January  
53 30<sup>th</sup>, 2020. As of 30<sup>th</sup> March 2020, more than 1250 cases had been identified in India, with 32  
54 deaths and 102 cases have been discharged after treatment [2]. Many key aspects about the  
55 disease dynamics are not known. To improve the understanding about the virus many  
56 researchers continue to contribute through peer review journals, blogs, reports and social media  
57 platforms [3]. One of the key endeavours among these knowledge products is the quest to  
58 quantify the burden of disease through the use of mathematical modelling [4,5,6] so that public  
59 health systems can prepare for emergency response.

60 India is a geographically, climatically and culturally diverse country with nearly 1.3 billion  
61 population [7]. The population density not only differs from urban to rural areas but also from  
62 state to state with Delhi having more than 11,000 people per square kilometre, while Arunachal  
63 Pradesh has only 17 people per square kilometre. The country has 53 cities which have more  
64 than a million population with a minimum density of 400 persons per square kilometre,  
65 according to the census of 2011. The country has 137 airports, including 23 international  
66 airports handling more than 6 million international and 20 million domestic passengers every  
67 month. The above information indicates the diversity of population distribution that can  
68 influence the spread of an infectious disease like COVID- 19 and the possibility of import via  
69 international passenger influx [8]. Though there have been recent publications on the estimated  
70 size of the epidemic in India, at times the methodology or the tools to replicate the same is not  
71 available in public domain limiting the access and validation of such tools [5,6] This paper  
72 describes a simple mathematical model to understand COVID-19 epidemic using observed data  
73 and provides a free tool that is available for anyone including the states, local governance  
74 system managers to download and use it to have a better understanding of the scale and  
75 progress. We present model projections for the Telangana state in southern India which has a  
76 population of around 39.64 million people and the sixth busiest international airport in India  
77 [9].

78

## 79 **Materials and Methods**

80 There are several mathematical models available and used for the different diseases including  
81 COVID-19 [10,11,12]. We used the well-known susceptible-infectious-recovered (SIR) Model  
82 for infectious diseases [12]. This is a simplistic yet effective *compartmental model* where  
83 individuals in a target population start from the compartment of "Susceptible" and upon  
84 infection, individuals move to the "Infected" compartment and subsequently they move to the  
85 recovered or removed compartment based on disease outcome. An inherent assumption of the  
86 simple SIR model is that every individual in the compartment has similar characteristics. The  
87 limited information on COVID-19 epidemic dynamics informs us that the virus behaves like  
88 the Severe Acute Respiratory Syndrome (SARS) epidemic family. The SARS infection was  
89 associated with a high level of immunity after infection [13]. We assumed that COVID-19  
90 creates similar immunity in the human body reducing the chance of reinfection. Also, there is  
91 no documented case of reinfection of COVID-19 in the current epidemic in the Republic of  
92 China or elsewhere. Thus, we assumed that all those who are infected will be "removed" from

93 the pool of susceptible either due to recovery or death. Because of the short nature of the  
94 epidemic elsewhere we assumed that the epidemic is not affected by larger population-level  
95 vital dynamics i.e. births, migration etc.

96 The SIR model is represented mathematically by a series of differential equations given below.

$$97 \quad \frac{dS}{dt} = -\frac{\beta IS}{N} \quad (1)$$

$$98 \quad \frac{dI}{dt} = \frac{\beta IS}{N} - \gamma I \quad (2)$$

$$99 \quad \frac{dR}{dt} = \gamma I \quad (3)$$

100

101 Where S= Susceptible Population, I= Infected Population, R= Removed (Recovered or Died).

102  $S+I+R=N$

103 For the purpose of our analyses, time (t) is the time since the first COVID19 case as reported

104 in Telangana state. For the purposes of this analysis, we have assumed a start date of 2

105 March, 2020 when the state of Telangana diagnosed its first case.

106

107 *Choice of parameter and optimisation:* We first calculated projections using transmission  
108 parameters reported by other geographical locations with a similar population density [Wang  
109 H et al (14,15)]. This will allow us to confirm population level disease dynamics of COVID19.  
110 We the used least squares optimisation to calculate transmission parameters based on actual  
111 reported data from the state. The transmission parameter ( $\beta$ ) from the S to the I compartment,  
112 defined as the average number of contacts per person per time was determined to be in the  
113 range 0.05-0.17. The transmission parameter from I to R compartment, ( $\gamma$ ) known as recovery  
114 rate was fixed at 1/18 (=0.056). This corresponds to a recovery period of approximately 18  
115 days. The model parameters were estimated using the sum of squares method and optimised  
116 using Limited-memory BFGS method [16]. The estimated incidence and the reported cases  
117 were re-checked visually for their fit.

118 We assumed a per person contact rate of 40 individuals and an initial infection probability of  
119 10% to arrive at estimated number of initial infected cases as 4. The gamma parameter for  
120 our SIR Model was fixed at 1/18 [14] as it agrees with observed data where the first five  
121 reported recoveries were after 16-20 days of isolation. We advise a note of caution here as the  
122 reported infected cases during the initial days of the outbreak may be an underestimate of the  
123 burden of disease due to limited testing in the country.

124

125 The  $\beta$  and  $\gamma$  values were used to calculate the basic reproduction number,  $R_0$ , which measures  
126 the transmissibility of a virus, representing the average number of new infections generated by  
127 each infected person.  $R_0 > 1$  indicates that the outbreak will continue to yield increasing  
128 number of infections unless effective control measures are implemented, while  $R_0 < 1$  indicates  
129 that the number of new cases decreases over time and, eventually, the outbreak will end. Thus,  
130  $R_0$  is a time-varying measure whose periodic assessment during an epidemic informs  
131 policymakers on the need for and effectiveness of interventions. We obtained projections for  
132 infections and mortality by calculating  $R_0$  by least squares optimisation and also based on a  
133 range of  $\beta$  values from 0.07 to 0.17 [14] for three different phases of nonpharmaceutical  
134 intervention (NPI) launched by policy makers in the state of Telangana. These phases are:

135 A. The  $R_0$  arrived using the optimisation of the observed cases in Telangana state from 2  
136 March 2020 to 4 April 2030

137 B. 2 March 2020 to 15 March 2020 (no intervention and limited face and hand hygiene  
138 messaging).

139 C. 16 March 2020 to 25 March 2020-voluntary social distancing (work-from-home and  
140 “Janta curfew” advisory [17]) and setting up of quarantine and isolation beds.

- 141 D. 26 March 2020 to 14 April 2020- population lockdown announced including closure of  
142 international airports and cargo ports  
143 E. 15 April 2020 onward post lockdown with partial resuming of population movement

144 The  $R_0$  for these scenarios is calculated to be (A) 1.38 ; (B) 3 ; (C) 2.6; (D) 1.9 and (E) 2.6.  
145 To obtain projections for mortality due to COVID19, we fit a simple moving average [18] of  
146 order 3 to the case fatality rate (CFR) observed over the 34-day period.  
147 All analysis was done using R-software (version3.3.3). The daily case report data from  
148 Telangana used for preparing figures 1,2 and 3 is available in supplementary table 1.

149

## 150 Results

151 Based on available data as of 4 April 2020(Ministry of Health and Family Welfare,  
152 [www.covid19india.org](http://www.covid19india.org)), of the 272 people who tested positive, 33(12.13%) recovered and  
153 11(4.0%) died. The figures below show the incident cases and cumulative cases after removal  
154 of recovered and died individuals during each phase of the NPI rolled out by the government.

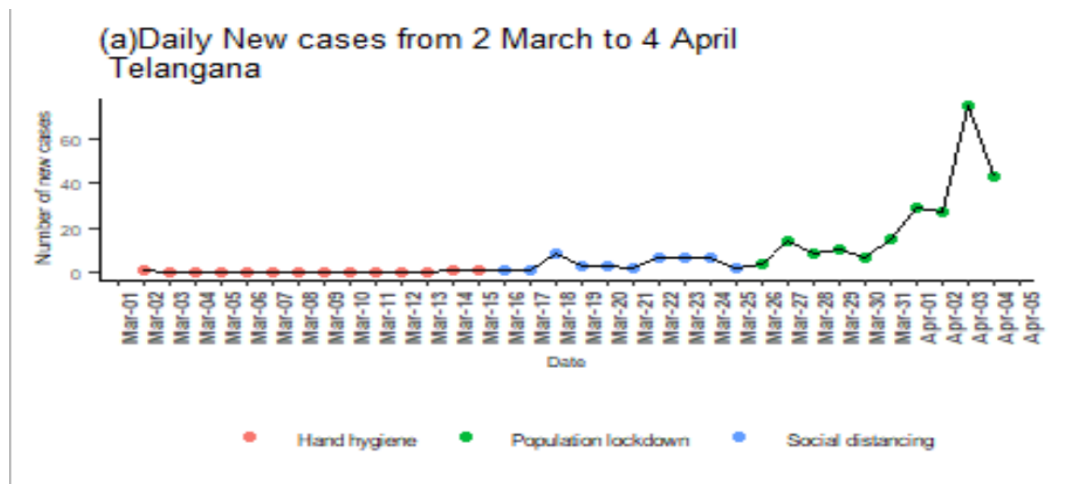

156

157

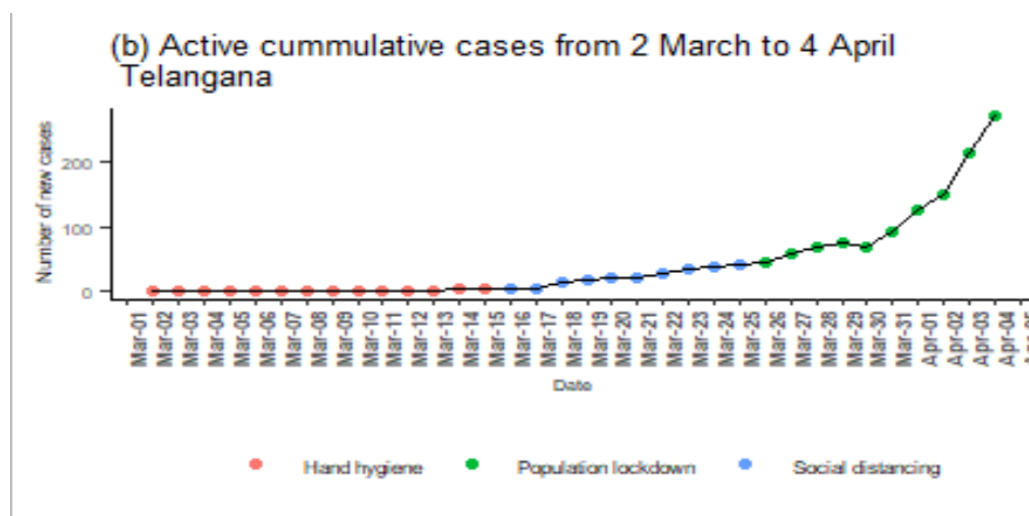

158

158 **Figure 1:**(a) Daily new COVID19 positive cases in Telangana from 2 March 2020 to 4 April  
159 2020 by three different phases of nonpharmaceutical intervention (b) Active cumulative  
160 COVID19 positive cases in Telangana from 2 March 2020 to 4 April 2020 by three different  
161 phases of nonpharmaceutical intervention

162

163 Projection of the spread of the infection in the Telangana population using the SIR model are  
164 presented in figure 2. The model (Figure 2) shows that in the absence of stringent  
165 interventions ( $R_0=3$ ) infections would peak towards the end of July and first week of August.  
166 An estimated number 11,910,208 individuals (36% of the population) of Telangana would  
167 have COVID19 infection during that time. The WHO estimates [19] that in India, 80% of the  
168 infections are currently asymptomatic or mild, 15% are severe enough to require  
169 hospitalisation and 5% need critical care (ICU with ventilator). By extension, this would  
170 translate to a public health requirement of at least 2,382,042 hospital beds for sever or critical  
171 patients at the projected peak of infection by first week of August 2020. The state of  
172 Telangana currently has 277,850 hospital beds.

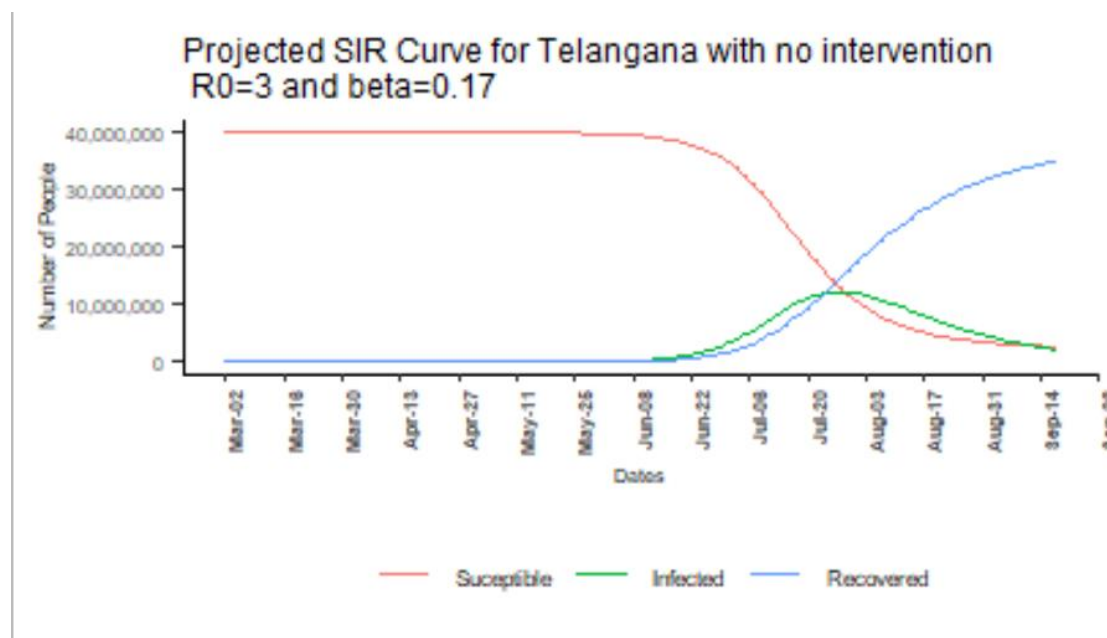

173

174 **Figure 2:** Projections of COVID19 spread for Telangana from SIR Model

175

176 Figure 3 shows that the  $R_0$  parameter value of 3 fits the initial observed cases quite well. The  
177 population lockdown started on March 25, so we can see the accrued effect of no intervention  
178 in the gradual increase in reported cases during March 26 to April 4.  
179

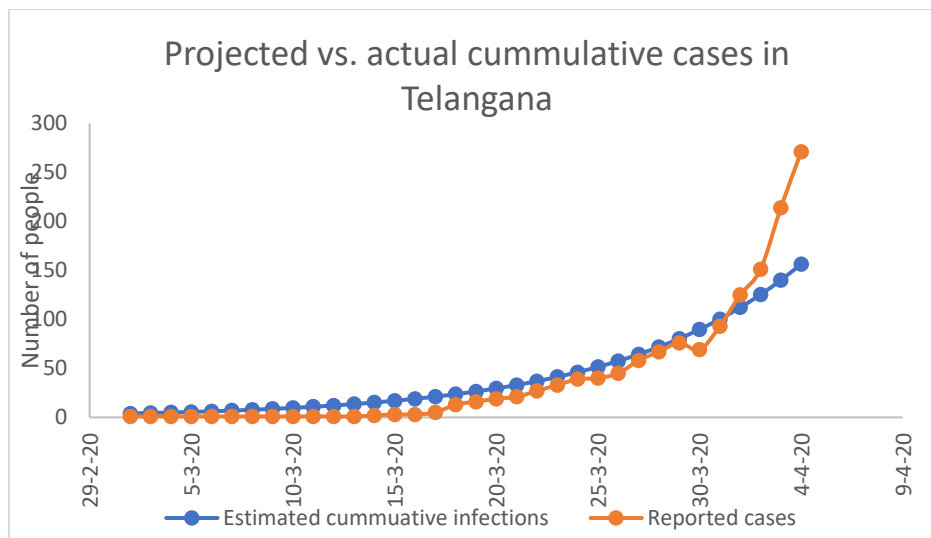

180  
181 Figure 3: Fitting SIR Model to reported cumulative COVID19 cases in Telangana (2 March  
182 2020 to 4 April 2020)

183 A sequential simulation of cumulative infection projections with distribution of the infected  
184 population by different phases of NPI initiated by the government of Telangana, is presented  
185 in figure 4.  
186

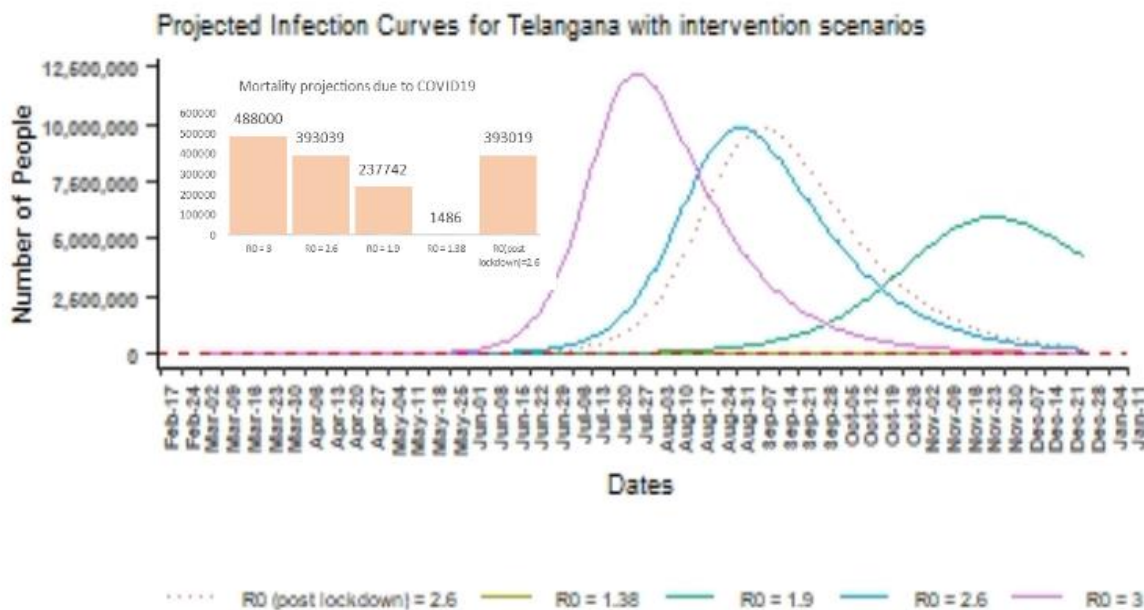

187  
188  
189 Figure 4: Projections of infection spread and mortality at peak with phased  
190 nonpharmaceutical Intervention scenarios from 2 March 2020 to 27 December 2020.  
191

192 Figure 4 also shows that with measures such as face and hand hygiene and public advisories  
193 on adherence to social distancing (NPI-C), the peak cumulative number of infections can be  
194 reduced by only 51.2% approximately (peak infections reduce from 11,910,208 to 5943550).  
195 With a complete population lockdown continuing beyond the stipulated 21 days, the peak  
196 infections reduce drastically by 99% indicating a dramatic and significant “flattening of the  
197 curve” [20]. Using the method of least squares to optimise the raw sum of squares using the  
198 L-BFGS-B method, the optimal values for  $\beta$  was 0.58 and  $\gamma=0.42$  which gives an  $R_0$  of 1.38  
199 for the initial 34 days of the observation period. Assuming this to represent the trend of cases  
200 in the state, the number of active cases at peak infection would be 37,157 and would yield  
201 death equal to 1486 (95% CI=(1003,1969)).

202 A simple moving average of order 3 was superimposed on the case fatality rate (CFR)  
203 obtained during the observation period of March 2 to April 4. This moving average series  
204 was used to forecast the CFR over a 60-day period. The average CFR was 4% with 95%  
205 confidence intervals (2.7%,5.3%). So even at the peak of infection in the voluntary social  
206 distancing and hand hygiene adherence phase, we could expect at least 2,37,740 fatalities  
207 with 95% CI (160,476, 315,008).

## 208 Discussion

209 The epidemic curve presented in the different scenarios give a range of the burden of the  
210 disease and the scenario of optimisation with the state level data gives a very optimistic  
211 scenario. Although the range of scenarios with and without interventions gives us a spread of  
212 projections, we however feel that the no interventions scenario may be close to the actual  
213 scenario till the second week of April as accumulated cases will reflect undiagnosed  
214 infections and unreported deaths in the community. This model considers data till ten days  
215 after the shutdown announcement by Government of India on 25 March 2020, which is closer  
216 to the incubation period of the disease, indicating that the infections detected in last ten days  
217 are not influenced by the shutdown. However, there are other measures like a ban on  
218 international travel, campaign on handwashing etc. that was ongoing for almost four weeks,  
219 thus the influence of the same on the epidemic progression must be factored in. After the  
220 peak around 120 days from the first detected case, the epidemic is expected to show a decline  
221 in numbers and be on the downward slope of the curve. Similar estimates are published for  
222 the duration of the epidemic in the United kingdom [21]. Assuming the most optimistic  
223 outcome of the NPI as presently envisaged, at the peak, the epidemic will lead to proven  
224 37,157 infections in the state of Telangana. However, this information needs to be  
225 contextualised with the natural history of the disease. the epidemic dynamics known to date  
226 and quality of reporting. COVID 19 is known to have asymptomatic infection among 17% of  
227 the infected population [22]. Based on data WHO reported [19], nearly 80 per cent are  
228 expected to have a mild or asymptomatic infection, which may manifest as a mild upper  
229 respiratory infection resembling mild common “flu” with severe cases needing critical  
230 care/ventilation of around 5%. Some authors have suggested that the actual mortality of  
231 COVID-19 may be much lower than what is reported and possible range between 0.25 per  
232 cent to 3 per cent, with their opinion favouring the lower estimates [23-27].  
233 In a national COVID model [24], the authors suggest two types of containment strategy i.e.  
234 (i) Port of entry and, (ii) mitigation – within-country connectivity. One of the arguments for  
235 the epidemic response was to have a robust screening at ports of entry and contact tracing  
236 program. Our preliminary model for Telangana state does not incorporate strategy (i). The  
237 capital city of Hyderabad has one international airport with total traffic of more than 20  
238 million in the year 2018-19, including 4 million international travellers. The city has good



239 railway and road connectivity to other important metro cities like the national capital of  
240 Delhi, Mumbai, Bengaluru and Chennai. Thus, the city is one of the high-risk areas for  
241 COVID-19 transmission. Other than being in the time of a highly transmissible virus-like  
242 COVID-19, the city has a high population density with 18,172 persons per Sq. Km [28].  
243 One of the limitations of this work is the lack of discrimination between urban and rural  
244 areas. This was deliberate as at the time of collating data, reports stratified by level of  
245 urbanization were not very reliable. However, the possibility of the infection/epidemic  
246 already moving beyond the city perimeter to other districts or rural parts of the state cannot  
247 be ignored.

248 It is well known that with the availability of new information, in recent years, the country  
249 changed epidemic estimates for other epidemics like HIV and TB [29,30]. Also historical  
250 experiences from earlier outbreaks [31] should be combined with new estimates to inform  
251 effective interventions. Any scientific estimation needs robust local data. COVID-19 is new,  
252 and as one moves in time, more evidence will be available for better estimations.

253 The authors would like to emphasise that, these are population level projections. The inherent  
254 assumptions will not address micro clusters such as health workers, the modelling does not  
255 adjust for vulnerable groups and loci that may be high risk locations such as hospitals. At the  
256 present time more data is needed to clearly understand the differential transmission dynamics  
257 in special groups. The model does not have the ability to project precisely what may happen  
258 after the lockdown is lifted, previous experience with the 1918 Influenza pandemic [31]  
259 suggests that many different possibilities exist. Measures such as lockdown are considered as  
260 drastic public health measures with their long-term benefits unclear but may also have varied  
261 impact on the society [32-34].

262

## 263 **Conclusion**

264

265 The outputs of this model show an expected population-level decline in the burden of  
266 reported infections/disease over time. The input data is influenced by the series of measures  
267 implemented locally by the authorities, thus its influence over the trajectory of the epidemic  
268 cannot be overlooked. As policymakers walk the tightrope of initiating public health  
269 interventions to contain the COVID19 epidemic, more granular analyses will be needed,  
270 especially in a country as socially and geographically diverse as India.

## 271 **Data Availability**

272 The authors used an open-source program (RStudio- version3.6.3) that is widely used and  
273 leaving the codes to be accessed by other researchers on Github (<https://github.com/>). All the  
274 data used in the analysis will be available in the supplementary material.

## 275 **Conflicts of Interest**

276 The authors declare that they have no conflict of interest to report.

## 277 **Funding Statement**

278 This study was funded by SHARE-INDIA internal research funds.

## 279 **Supplementary Materials**

280 The data used in the analyses is available in Supplementary Table S1.

## 281 **References**

- 282 1. IHR Emergency Committee on Novel Coronavirus (2019-nCoV) [Internet]. [cited  
283 2020 Mar 30]. Available from: [https://www.who.int/dg/speeches/detail/who-director-](https://www.who.int/dg/speeches/detail/who-director-general-s-statement-on-ih-er-emergency-committee-on-novel-coronavirus-(2019-Nov))  
284 [general-s-statement-on-ih-er-emergency-committee-on-novel-coronavirus-\(2019-Nov\)](https://www.who.int/dg/speeches/detail/who-director-general-s-statement-on-ih-er-emergency-committee-on-novel-coronavirus-(2019-Nov))
- 285 2. Ministry of Health and Family Welfare. Update COVID-19 [Internet]. [cited 2020  
286 Mar 30]. Available from: <https://www.mohfw.gov.in/>
- 287 3. COVID-19 – MIDAS [Internet]. [cited 2020 Mar 30]. Available from:  
288 <https://midasnetwork.us/covid-19/>
- 289 4. Kucharski AJ, Russell TW, Diamond C, Liu Y, Edmunds J, Funk S, et al. Early  
290 dynamics of transmission and control of COVID-19: a mathematical modelling study.  
291 *Lancet Infect Dis.* 2020;3099(20):1–7.
- 292 5. Mandal S, Bhatnagar T, Arinaminpathy N, Agarwal A, Chowdhury A, Murhekar M,  
293 et al. Prudent public health intervention strategies to control the coronavirus disease  
294 2019 transmission in India: A mathematical model-based approach. *Indian J Med Res*
- 295 6. Center for Disease Dynamics E& P. COVID-19 Modeling with IndiaSIM [Internet].  
296 2020 [cited 2020 Mar 30]. Available from: <https://cddep.org/covid-19/>
- 297 7. The World Bank. Population, total - India | Data [Internet]. [cited 2020 Apr 1].  
298 Available from: <https://data.worldbank.org/indicator/SP.POP.TOTL?locations=IN>
- 299 8. Wells, Chad R., Pratha Sah, Seyed M. Moghadas, Abhishek Pandey, Affan Shoukat,  
300 Yaning Wang, Zheng Wang, Lauren A. Meyers, Burton H. Singer, and Alison P.  
301 Galvani. "Impact of international travel and border control measures on the global  
302 spread of the novel 2019 coronavirus outbreak." *Proceedings of the National*  
303 *Academy of Sciences* 117, no. 13 (2020): 7504-7509.
- 304 9. <https://www.aai.aero/sites/default/files/traffic-news/Mar2K19Annex3.pdf>
- 305 10. Ng WT, Turinici G, Danchin A. A double epidemic model for the SARS propagation.  
306 *BMC Infect Dis.* 2003;3:1–16.
- 307 11. Gilmour S, Yoneoka D, Wang Y, Dhungel B, Li J, Du Z, et al. A Bayesian estimate  
308 of the underreporting rate for COVID-19 based on the experience of the Diamond  
309 Princess cruise ship. *WHO Bull* [Internet]. 2020 Mar [cited 2020 Apr 2]; Available  
310 from: <http://dx.doi.org/10.2471/BLT.20.254565>
- 311 12. Kermack WO, McKendrick A.G. A contribution to the mathematical theory of  
312 epidemics. *Proc R Soc London Ser A, Contain Pap a Math Phys Character* [Internet].  
313 1927 Aug 1 [cited 2020 Apr 1];115(772):700–21. Available from:  
314 <https://royalsocietypublishing.org/doi/10.1098/rspa.1927.0118>
- 315 13. Tang F, Quan Y, Xin Z-T, Wrammert J, Ma M-J, Lv H, et al. Lack of Peripheral  
316 Memory B Cell Responses in Recovered Patients with Severe Acute Respiratory  
317 Syndrome: A Six-Year Follow-Up Study. *J Immunol.* 2011;186(12):7264–8.
- 318 14. Wang, Huwen, Zezhou Wang, Yinqiao Dong, Ruijie Chang, Chen Xu, Xiaoyue Yu,  
319 Shuxian Zhang et al. "Phase-adjusted estimation of the number of coronavirus disease  
320 2019 cases in Wuhan, China." *Cell Discovery* 6, no. 1 (2020): 1-8.
- 321 15. Imai, N. et al. Report 3: Transmissibility of 2019-nCoV.  
322 [https://www.imperial.ac.uk/mrc-global-infectious-disease-analysis/news-wuhan-](https://www.imperial.ac.uk/mrc-global-infectious-disease-analysis/news-wuhan-coronavirus/)  
323 [coronavirus/](https://www.imperial.ac.uk/mrc-global-infectious-disease-analysis/news-wuhan-coronavirus/) (2020).
- 324 16. Liu, D. C.; Nocedal, J. (1989). "On the Limited Memory Method for Large Scale  
325 Optimization". *Mathematical Programming B.* 45 (3): 503–528.

- 326 17. The Economic Times. March 22, 2020 6:15 A.M IST.  
327 [https://economictimes.indiatimes.com/news/politics-and-nation/india-to-observe-](https://economictimes.indiatimes.com/news/politics-and-nation/india-to-observe-janata-curfew-on-sunday-amid-spurt-in-coronavirus-cases/articleshow/74750784.cms)  
328 [janata-curfew-on-sunday-amid-spurt-in-coronavirus-cases/articleshow/74750784.cms](https://economictimes.indiatimes.com/news/politics-and-nation/india-to-observe-janata-curfew-on-sunday-amid-spurt-in-coronavirus-cases/articleshow/74750784.cms)  
329 18. Hyndman, Rob J. "Moving Averages." (2011): 866-869.  
330 19. World Health Organisation. Coronavirus disease 2019 (COVID-19):Situation Report-  
331 46. 2020 Feb.  
332 20. Stanclift, Michael. "Flattening the Curve of COVID-19: Why slowing the spread will  
333 save lives."  
334 21. Danon L, Brooks-Pollock E, Bailey M, Keeling M. A spatial model of CoVID-19  
335 transmission in England and Wales: early spread and peak timing. [cited 2020 Apr 3];  
336 Available Ffrom <https://doi.org/10.1101/2020.02.12.20022566>  
337 22. Mizumoto K, Kagaya K, Zarebski A, Chowell G. Estimating the asymptomatic  
338 proportion of coronavirus disease 2019 (COVID-19) cases on board the Diamond  
339 Princess cruise ship, Yokohama, Japan, 2020. *Eurosurveillance*. 2020;25(10):1–5.  
340 23. Chatterjee P, Nagi N, Agarwal A, Das B, Banerjee S, Sarkar S, Gupta N,  
341 Gangakhedkar RR. The 2019 novel coronavirus disease (COVID-19) pandemic: A  
342 review of the current evidence. *The Indian journal of medical research*. 2020 Mar 30.  
343 24. Mandal S, Bhatnagar T, Arinaminpathy N, Agarwal A, Chowdhury A, Murhekar M,  
344 et al. Prudent public health intervention strategies to control the coronavirus disease  
345 2019 transmission in India: A mathematical model-based approach. *Indian J Med Res*  
346 [Internet]. 2020 Mar 23 [cited 2020 Apr 1]; Available from:  
347 <http://www.ncbi.nlm.nih.gov/pubmed/32202261>  
348 25. Kucharski AJ, Russell TW, Diamond C, Liu Y, Edmunds J, Funk S, et al. Articles  
349 Early dynamics of transmission and control of COVID-19: a mathematical modelling  
350 study. *Lancet Infect Dis* [Internet]. 2020 [cited 2020 Apr 3]; Available from:  
351 [www.thelancet.com/infection](http://www.thelancet.com/infection)  
352 26. Baud, David, Xiaolong Qi, Karin Nielsen-Saines, Didier Musso, Léo Pomar, and  
353 Guillaume Favre. "Real estimates of mortality following COVID-19 infection." *The*  
354 *Lancet Infectious Diseases* (2020).  
355 27. Jung, Sung-mok, Andrei R. Akhmetzhanov, Katsuma Hayashi, Natalie M. Linton,  
356 Yichi Yang, Baoyin Yuan, Tetsuro Kobayashi, Ryo Kinoshita, and Hiroshi Nishiura.  
357 "Real-time estimation of the risk of death from novel coronavirus (COVID-19)  
358 infection: inference using exported cases." *Journal of clinical medicine* 9, no. 2  
359 (2020): 523.  
360 28. Directorate of Census Operations. ANDHRA PRADESH VILLAGE AND TOWN  
361 DIRECTORY DIRECTORATE OF CENSUS OPERATIONS DISTRICT CENSUS  
362 HANDBOOK HYDERABAD-Census of India 2011. 2011.  
363 29. Deiss RG, Rodwell TC, Garfein RS. Tuberculosis and Illicit Drug Use: Review and  
364 Update. *Clin Infect Dis* [Internet]. 2009 Jan [cited 2020 Jan 27];48(1):72–82.  
365 Available from: <https://academic.oup.com/cid/article-lookup/doi/10.1086/594126>  
366 30. Dandona, Lalit, and Rakhi Dandona. "Drop of HIV estimate for India to less than  
367 half." *The Lancet* 370, no. 9602 (2007): 1811-1813.  
368 31. Hatchett RJ, Mecher CE, Lipsitch M. Public health interventions and epidemic  
369 intensity during the 1918 influenza pandemic. *Proceedings of the National Academy*  
370 *of Sciences*. 2007 May 1;104(18):7582-7.  
371 32. Grechyna, Daryna. "Health Threats Associated with Children Lockdown in Spain  
372 during COVID-19." Available at SSRN 3567670 (2020).  
373 33. Sussman, Aaron. "Learning in lockdown: School police, race, and the limits of law."  
374 *UCLA L. Rev.* 59 (2011): 788.

- 375 34. Ayittey, Foster Kofi, Matthew Kormla Ayittey, Nyasha Bennita Chiwero, Japhet  
376 Senyo Kamasah, and Christian Dzuovor. "Economic impacts of Wuhan 2019-nCoV on  
377 China and the world." *Journal of Medical Virology* (2020).  
378 35.  
379 36.  
380 37.  
381 38.
